# Supplementary material for: The structural evolution of 3D-RGO with reduction temperature and its effect on capacitive deionization performance
Source: Royal Society of Chemistry journal article supplement (doi:10.1039/d1ew00598g), 2022-01-01
Supplement: d1ew00598g1.pdf [file d1ew00598g1.pdf]

## Supporting Information

### The Structural Evolution of 3D-RGO with Reduction Temperature and its Effect on Capacitive Deionization Performance

*Kun Liu<sup>†,‡</sup>, Bingbing Chen<sup>‡,§</sup>, Aihu Feng<sup>‡</sup>, Ruixiang Deng<sup>‡</sup>, Xuebing Hu<sup>†</sup>, Jianer Zhou<sup>\*,†</sup>, Yun Yu<sup>\*,‡,§</sup>,*

<sup>†</sup> School of Materials Science and Engineering, Jingdezhen Ceramic University,  
Jingdezhen, 333403, PR China

<sup>‡</sup> Key Laboratory of Inorganic Coating Materials CAS, Shanghai Institute of Ceramics, Chinese Academy of Sciences (SICCAS), Shanghai 201899, PR China

<sup>§</sup> Center of Materials Science and Optoelectronics Engineering, University of Chinese Academy of Sciences (UCAS), Beijing 100049, PR China

***\*Corresponding Author***

*Yun Yu ([yunyush@mail.sic.ac.cn](mailto:yunyush@mail.sic.ac.cn));*

*Jianer Zhou ([lp0518@126.com](mailto:lp0518@126.com)).*

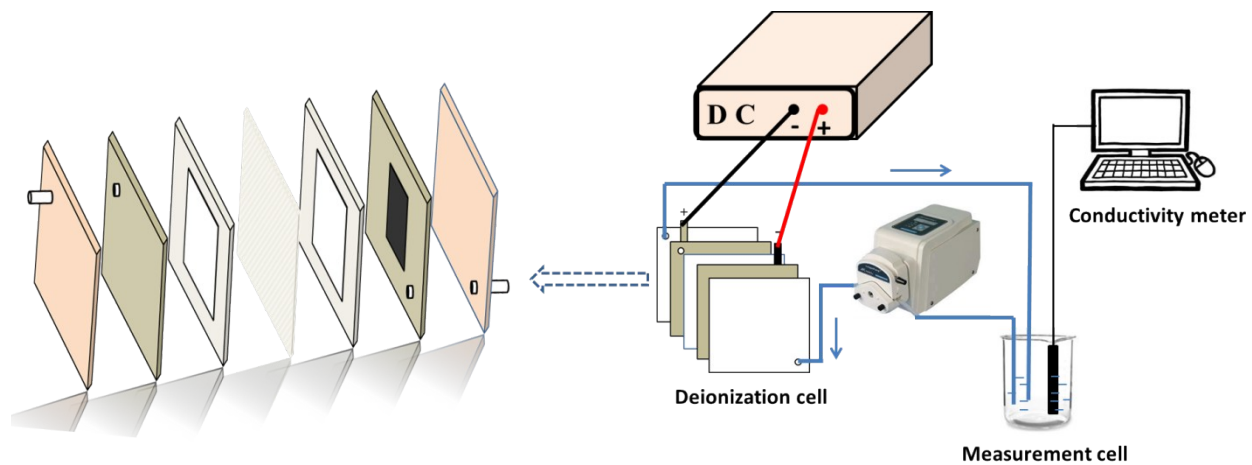

**Fig. S1.** The schematic of the CDI measuring system

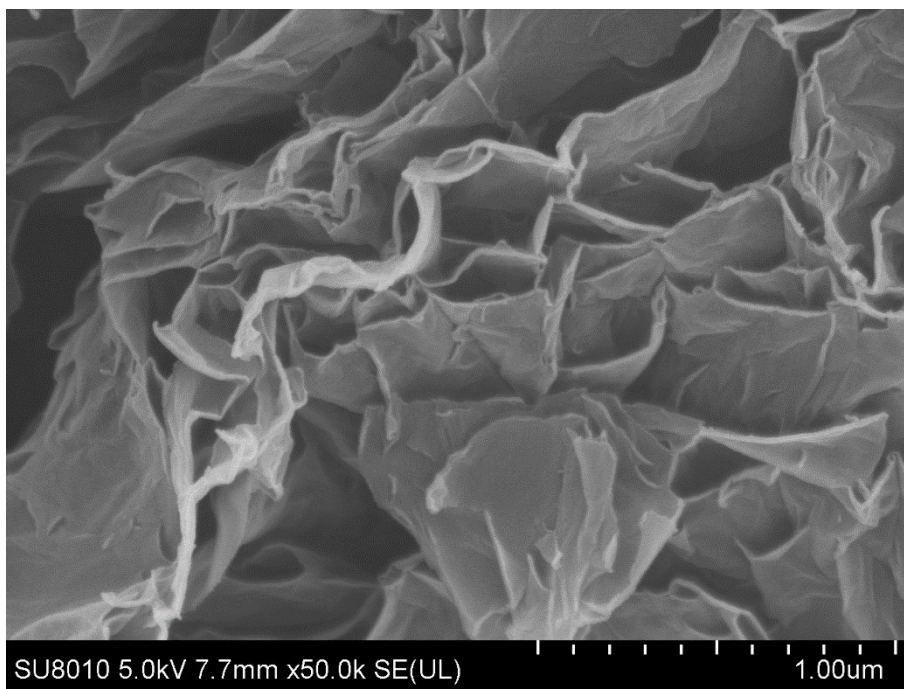

**Fig. S2.** SEM images of RGO-650 °C

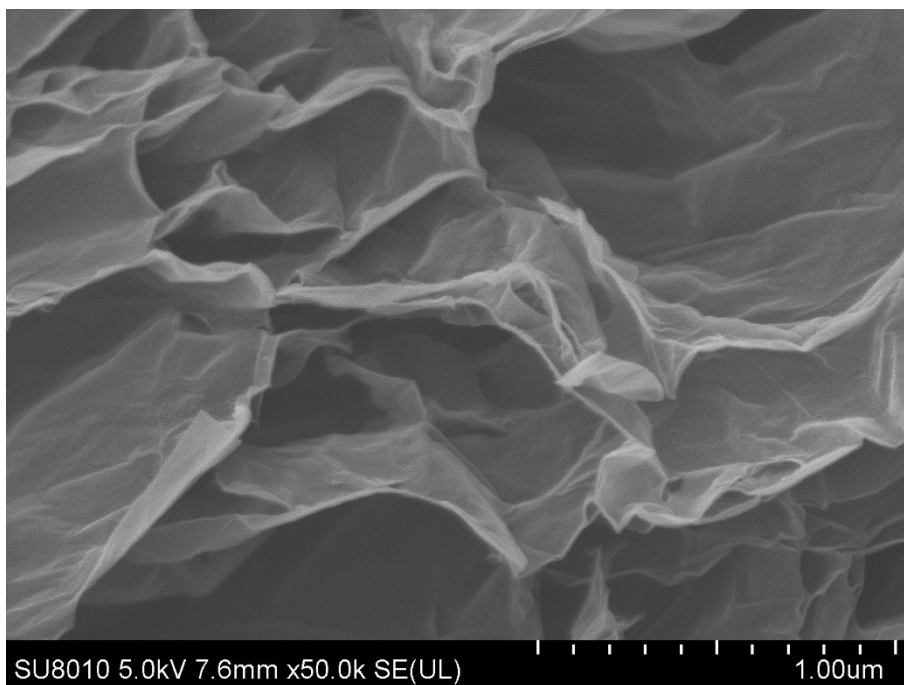

**Fig. S3.** SEM images of RGO-850 °C

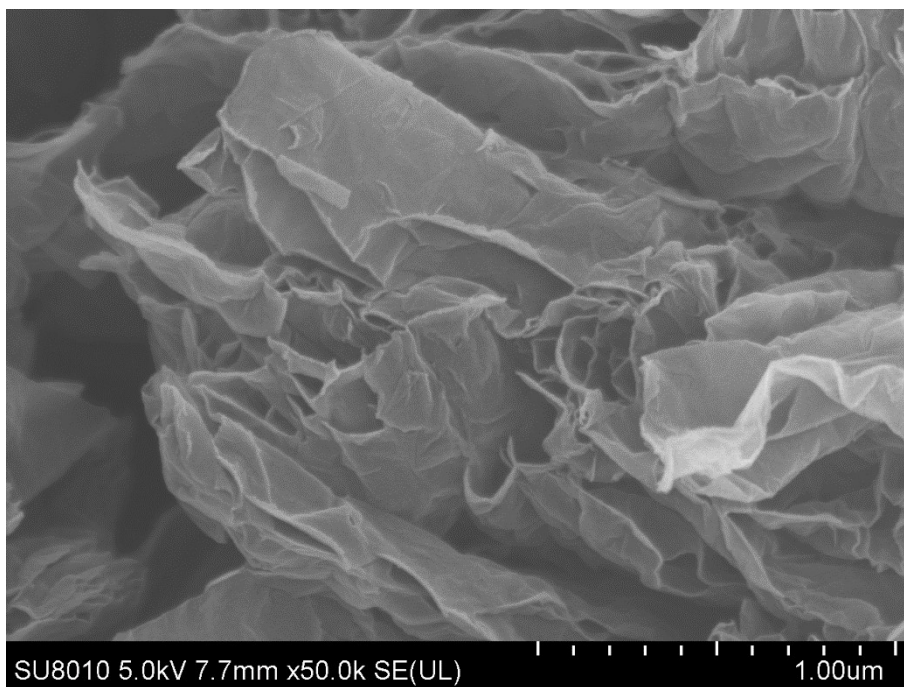

**Fig. S4.** SEM images of RGO-1050 °C

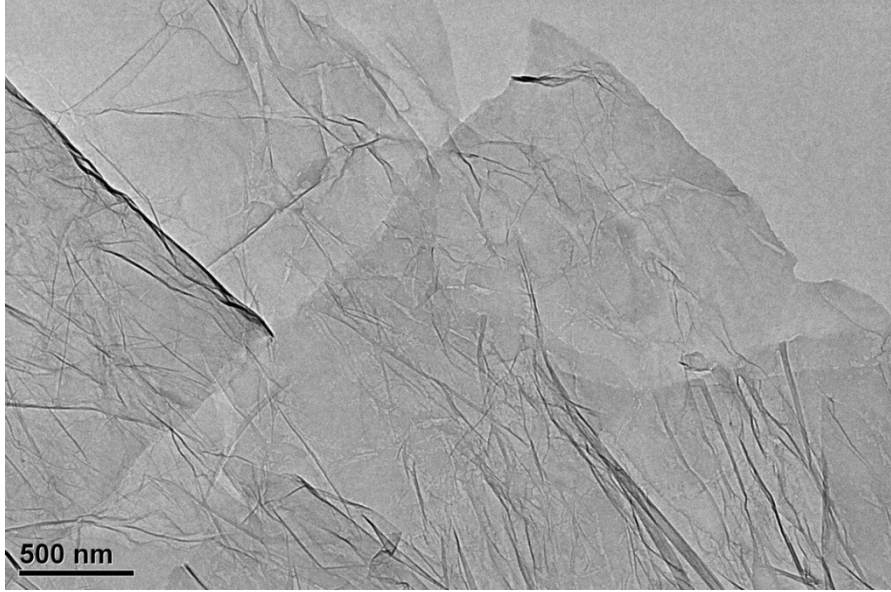

**Fig. S5.** TEM images of RGO-650 °C

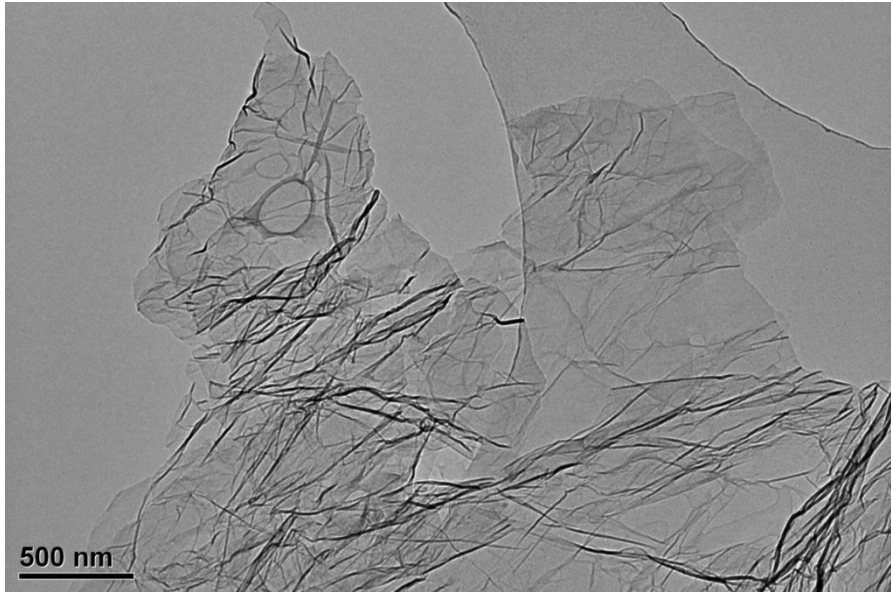

**Fig. S6.** TEM images of RGO-850 °C

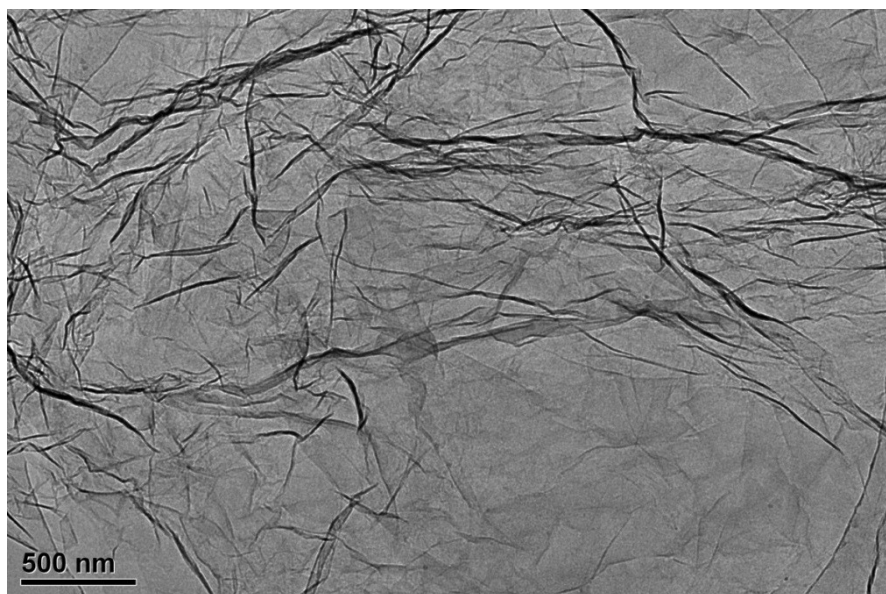

Fig. S7. TEM images of RGO-1050 °C

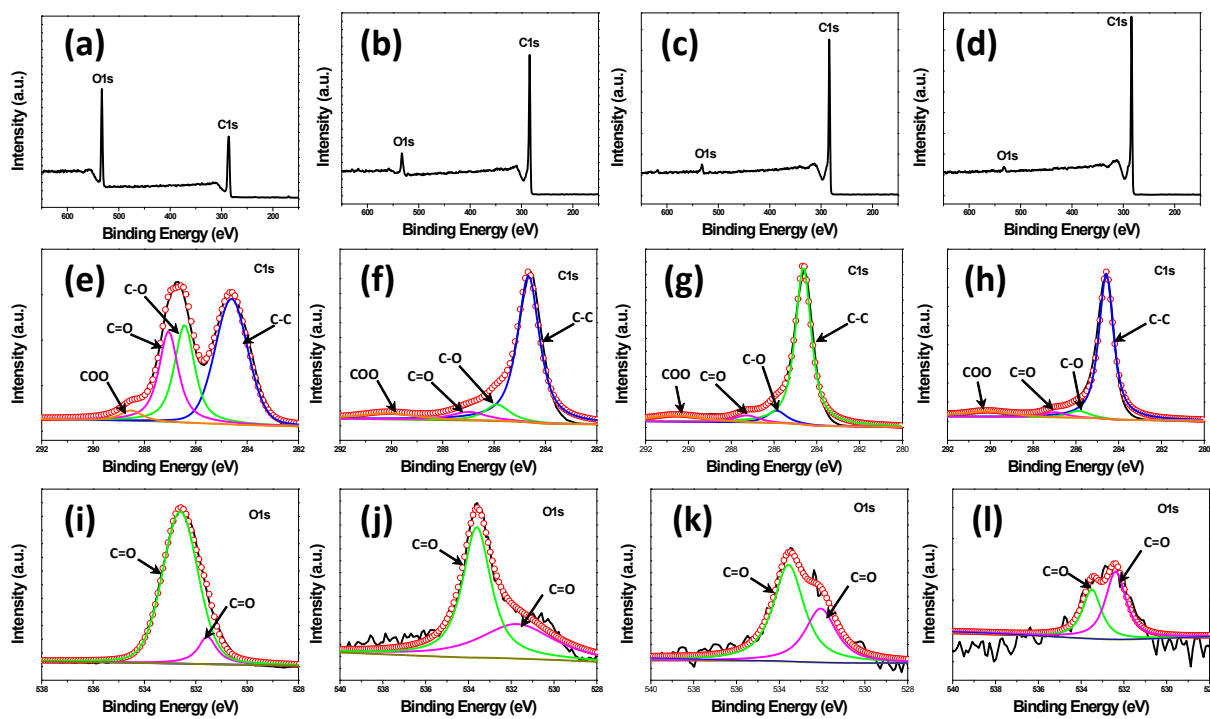

Fig. S8. XPS spectra of (a, e, i) GO; (b, f, j) RGO-650 °C; (c, g, k) RGO-850 °C; (d, h, l) RGO-1050 °C.

**Table S1.** The elemental composition of GO, RGO-650, RGO-850, and RGO-1050 by XPS analysis.

| Sample   | C (%) | O (%) | C/O   |
|----------|-------|-------|-------|
| GO       | 69.64 | 30.36 | 2.29  |
| RGO-650  | 92.85 | 7.15  | 12.98 |
| RGO-850  | 96.04 | 3.96  | 24.25 |
| RGO-1050 | 98.25 | 1.75  | 56.14 |

**Table S2.** The compositional analysis and C/O ratio of GO, RGO-650, RGO-850, and RGO-1050 by XPS.

|          | Carbon atoms % |       |       |       |
|----------|----------------|-------|-------|-------|
|          | C-C            | C-O   | C=O   | C(O)O |
| GO       | 52.66          | 22.58 | 20.56 | 4.2   |
| RGO-650  | 74.51          | 10.41 | 7.26  | 7.82  |
| RGO-850  | 76.70          | 7.54  | 5.57  | 10.19 |
| RGO-1050 | 78.93          | 5.72  | 4.82  | 10.52 |
